# Supplementary material for: Chromatin remodeling is restricted by transient GATA6 binding during iPSC differentiation to definitive endoderm
Source: PubMed Central journal article supplement — iScience. 2022 Apr 25;25(5):104300. doi: 10.1016/j.isci.2022.104300 (PMC9118154; doi:10.1016/j.isci.2022.104300), 2022-04-25
Supplement: mmc1.pdf [file mmc1.pdf]

iScience, Volume 25

**Supplemental information**

**Chromatin remodeling is restricted by transient  
GATA6 binding during iPSC differentiation  
to definitive endoderm**

**James A. Heslop, Behshad Pournasr, and Stephen A. Duncan**

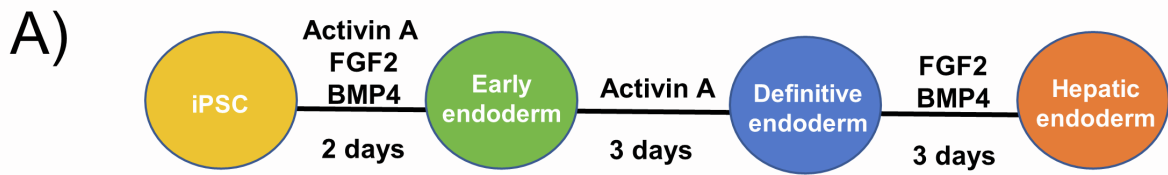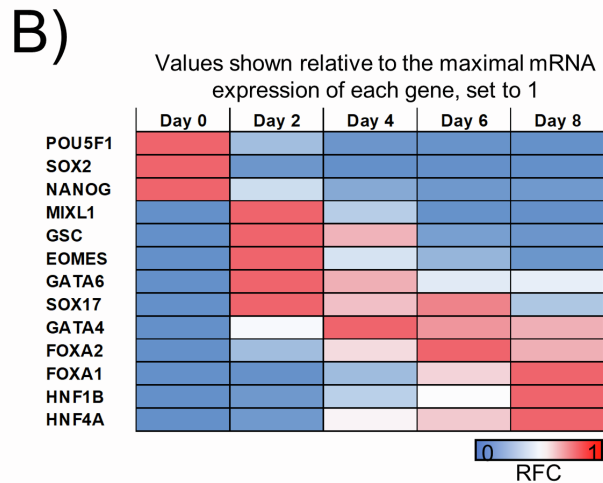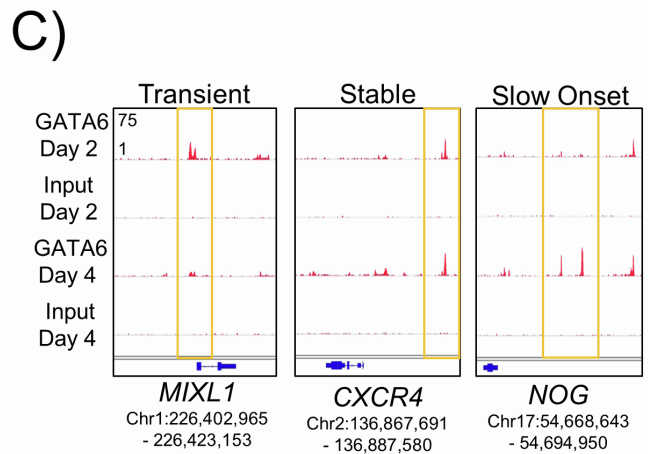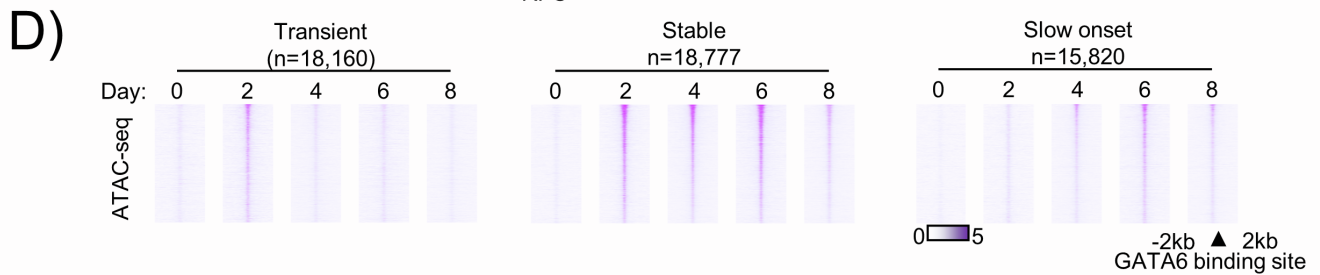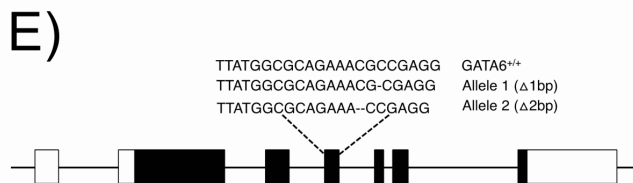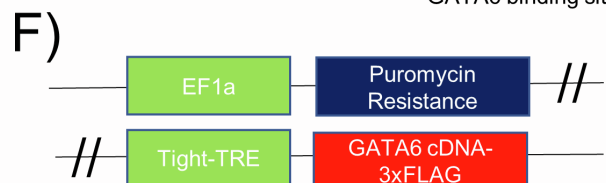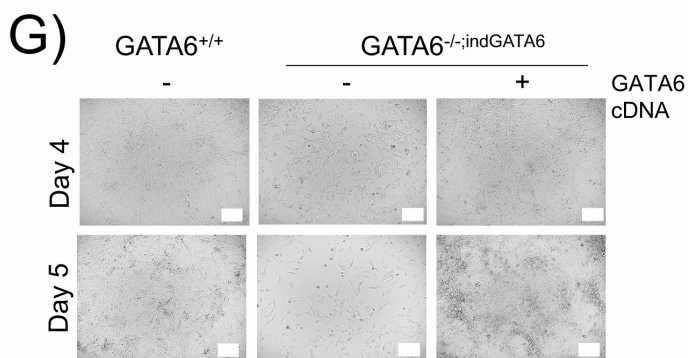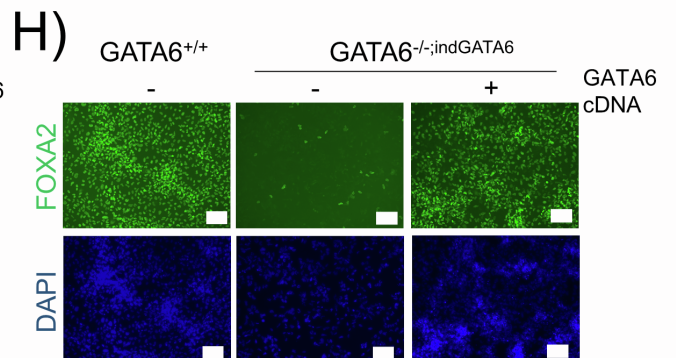

**Figure S1: Further characterization of *GATA6*<sup>+/+</sup> and *GATA6*<sup>-/-</sup> iPSCs.** Related to Figure 2. A) The hepatic endoderm differentiation protocol; B) mRNA expression of key endoderm-enriched transcription factor expression during the commitment of iPSCs to hepatic endoderm. Values shown relative to the peak expression of each transcription factor, set to 1. Data derived from RNA-seq samples, n=2 mean; C) Genome viewer representation of selected regions that display transient, stable and slow onset GATA6 binding profiles during endoderm formation in *GATA6*<sup>+/+</sup> cells; D) Heatmaps depicting ATAC-seq signal intensity at different subsets of GATA6 binding during hepatic endoderm formation; E) CRISPR/Cas9 targeting of GATA6 exon 4; F) Doxycycline-inducible *GATA6*-3xFLAG cDNA vector inserted into *GATA6*<sup>-/-</sup> cells; G) Phase contrast images of *GATA6*<sup>+/+</sup> and *GATA6*<sup>-/-</sup> cells ± doxycycline cells at day 4 and 5 of the hepatic endoderm differentiation protocol. Sale bar: 100μM; H) Immunofluorescence analysis of *GATA6*<sup>+/+</sup> and *GATA6*<sup>-/-</sup> cells ± doxycycline cells for FOXA2 at day 4 of differentiation. Sale bar: 100μM.

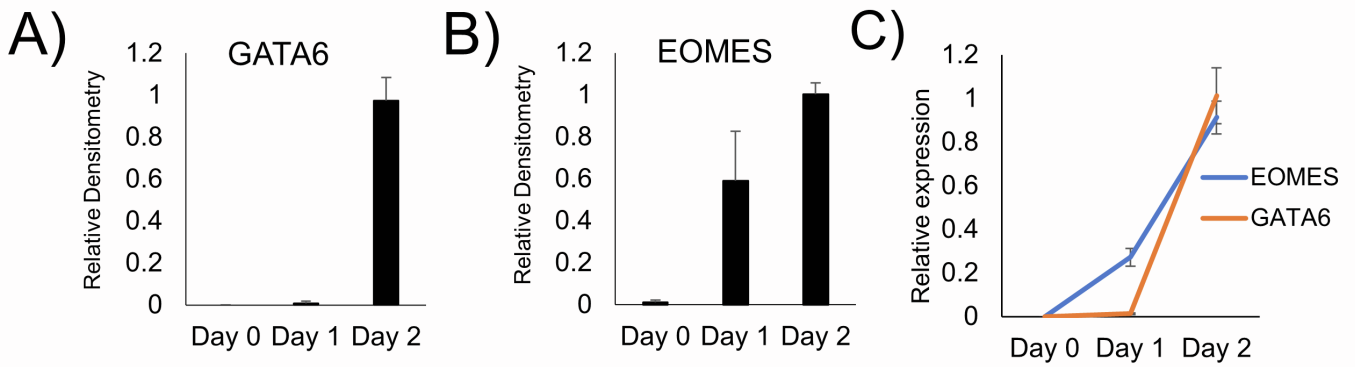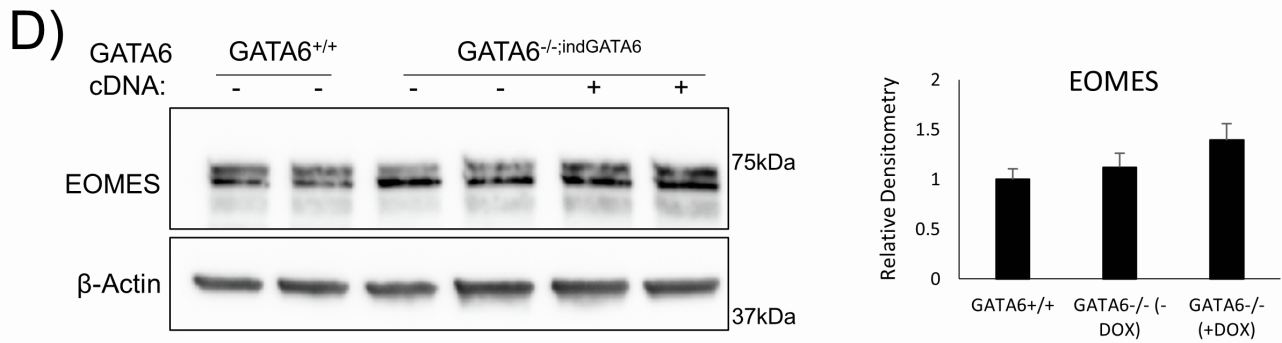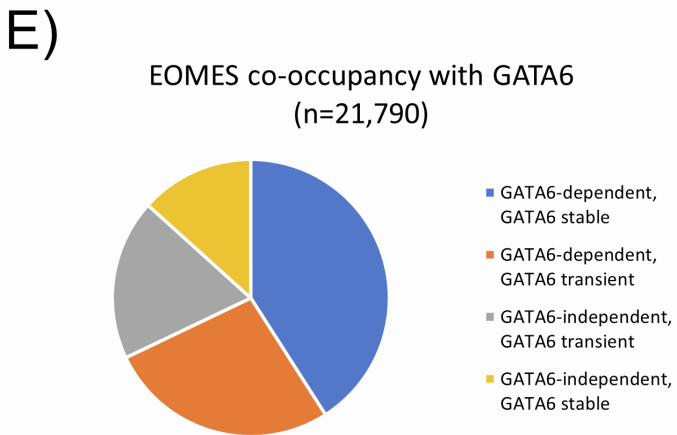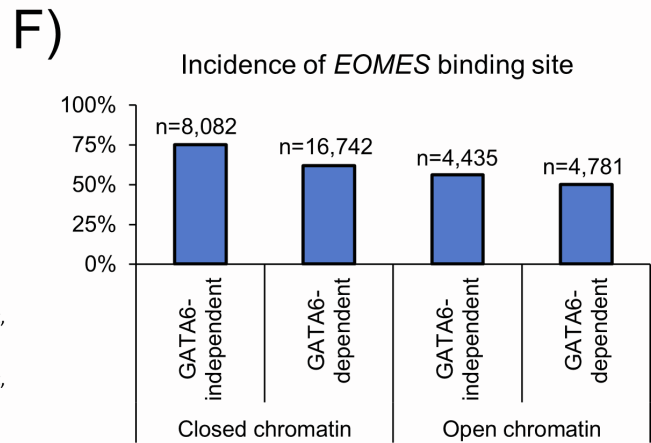

**Figure S2: Characterization of EOMES binding and chromatin opening in *GATA6*<sup>+/+</sup> and *GATA6*<sup>-/-</sup> early endoderm.** Related to Figures 3 and 4. A) Quantification of GATA6 western blots normalized to  $\beta$ -actin, shown relative to day 2 value, n=3 mean  $\pm$  SD; B) Quantification of EOMES western blots normalized to  $\beta$ -actin, shown relative to day 2 value, n=3 mean  $\pm$  SD; C) RT-qPCR analysis of *GATA6* and *EOMES* mRNA levels during early endoderm formation. Values normalized to the housekeeping mRNA *RPL13a* and shown relative to day 2 values. n=3 mean  $\pm$  SD; D) EOMES expression in *GATA6*<sup>+/+</sup> and *GATA6*<sup>-/-</sup> cells  $\pm$  doxycycline at day 2 of differentiation, measured by western blot for EOMES and  $\beta$ -actin (left panel). Quantification of blots (right panel), normalized to  $\beta$ -actin and shown relative to wildtype values, n=2 mean  $\pm$  SD; E) Pie chart representing the regions of EOMES co-occupancy with GATA6, divided by sites that occur at transient or stable GATA6 binding subsets and whether the EOMES binding is GATA6-independent or GATA6-dependent; F) Graph depicting incidence of the canonical EOMES motif at sites of EOMES occupancy in open and closed chromatin that is either GATA6-independent and GATA6-dependent;

A)

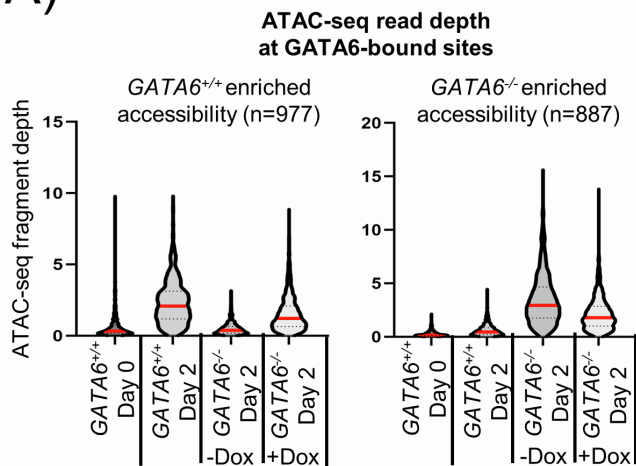

B)

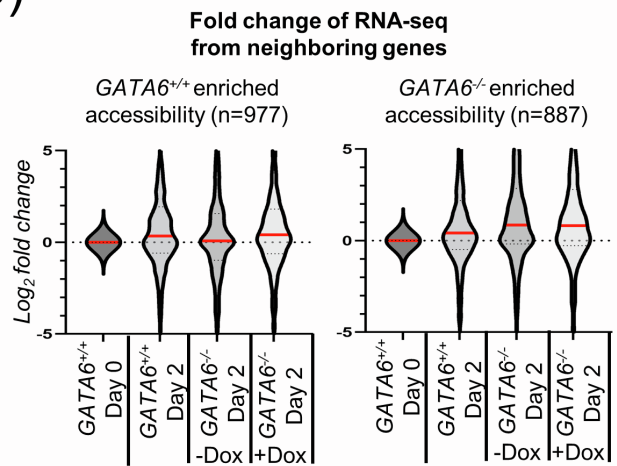

C)

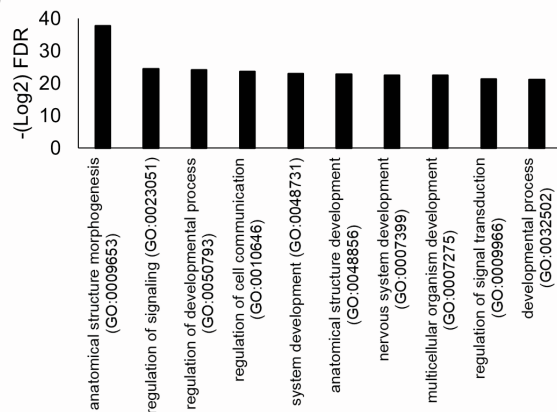

D)

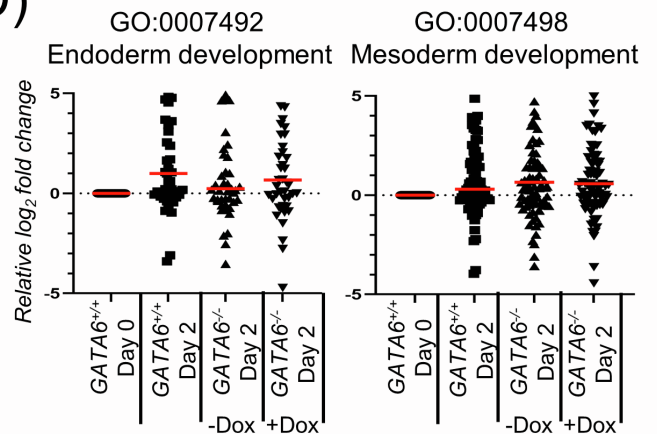

**Figure S3: GATA6-dependent gene expression at sites neighboring GATA6-dependent remodeling.** Related to Figure 4. A, B) Violin plots depicting the relationship between regions of A) differentially accessible chromatin and B) the mRNA expression of the neighboring genes. ATAC-seq data displayed as fragment depth, mRNA displayed as the  $\log_2$  fold change of each neighboring gene relative to day 0 values. Red line indicates median value; C) GO biological process analysis. The top ten significantly enriched pathways related to the genes that neighbor regions of chromatin of chromatin uniquely accessible in *GATA6*<sup>-/-</sup> cells; D) mRNA expression of genes found uniquely within the endoderm and mesoderm development GO biological processes gene sets, genes found in both sets were removed. mRNA displayed as individual values of the  $\log_2$  fold change of each neighboring gene relative to day 0 values. Red line indicates median value.

A)

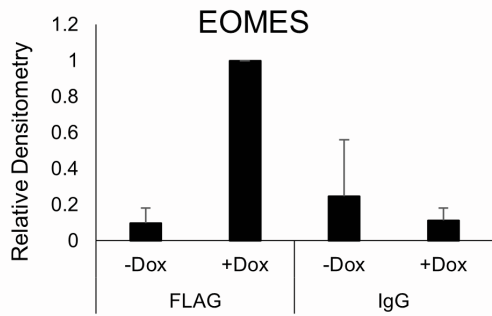

B)

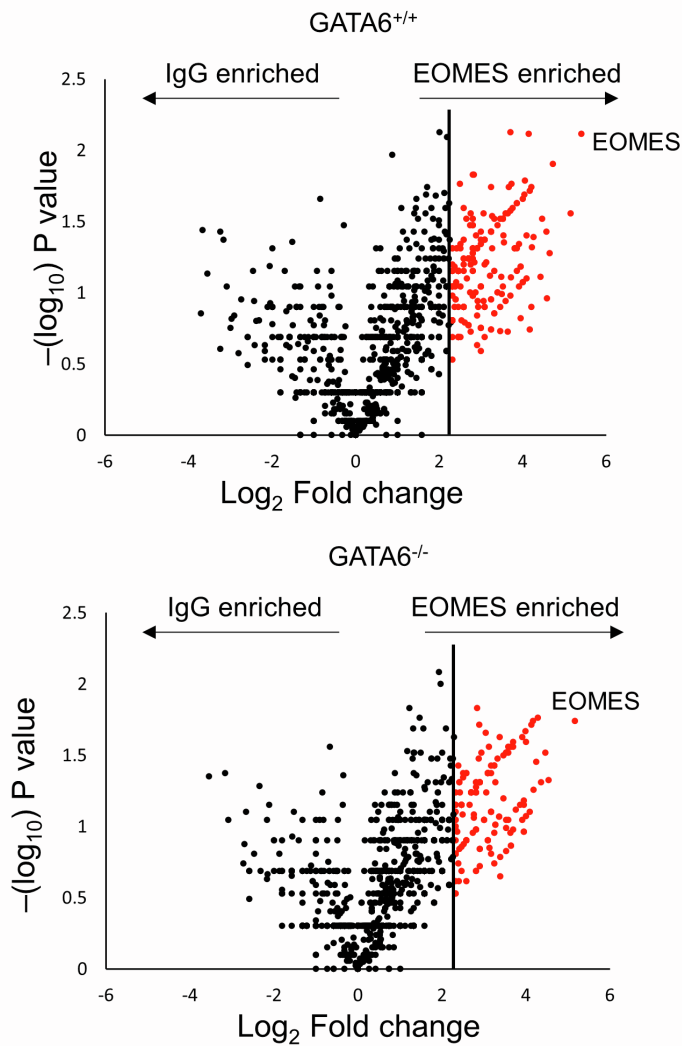

C)

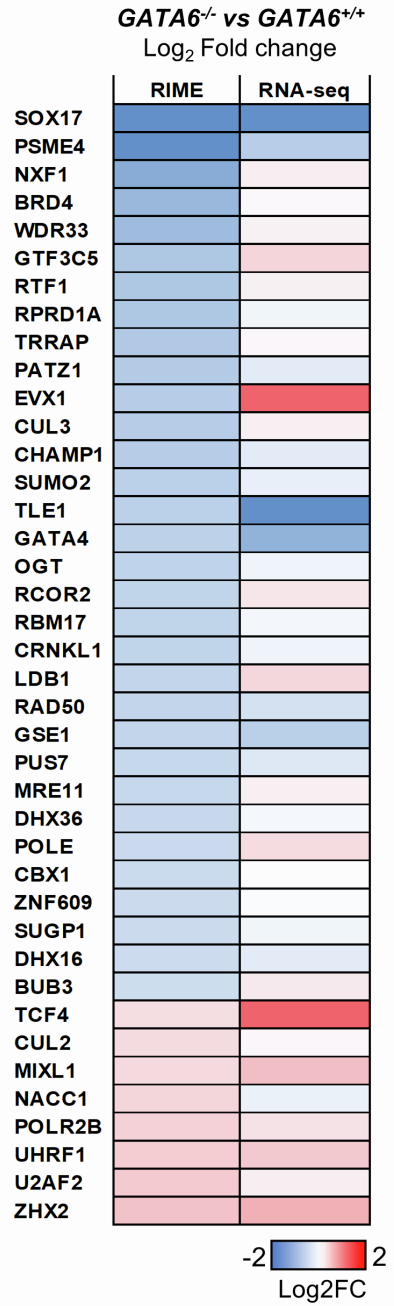



**Figure S4: Additional RIME analysis.** Related to Figure 5. A) Quantification of EOMES western blots following FLAG or IgG immunoprecipitation, n=3 mean  $\pm$  SD; B) Proteins enriched within the EOMES interactome in *GATA6*<sup>+/+</sup> or *GATA6*<sup>-/-</sup> cells as determined by RIME analysis at day 2 of differentiation; C) Heatmaps representing the relative log<sub>2</sub> fold change in protein enrichment and mRNA expression corresponding to proteins with differential enrichment ( $-0.3 > \log_2 \text{ fold change} > 0.3$ ) in *GATA6*<sup>-/-</sup> compared to *GATA6*<sup>+/+</sup> cells at day 2 of differentiation.
